# Supplementary material for: High performance complementary WS2 devices with hybrid Gr/Ni contacts
Source: Royal Society of Chemistry journal article supplement (doi:10.1039/d0nr05737a), 2020-01-01
Supplement: d0nr05737a1.pdf [file d0nr05737a1.pdf]

# Supplementary Information

## High Performance Complementary WS<sub>2</sub> Devices with Hybrid Gr/Ni Contacts

Muhammad Farooq Khan<sup>1†\*</sup>, Faisal Ahmed<sup>2,3†</sup>, Shania Rehman<sup>1</sup>, Imtisal Akhtar<sup>4</sup>, Malik Abdul Rehman<sup>5</sup>, Pragati A. Shinde<sup>5</sup>, Karim Khan<sup>6,7</sup>, Deok-kee Kim<sup>1</sup>, Jonghwa Eom<sup>8</sup>, Harri Lipsanen<sup>2</sup> and Zhipei Sun<sup>2</sup>

<sup>1</sup>Department of Electrical Engineering, Sejong University, 209 Neungdong-ro, Gwangjin-gu, Korea. <sup>2</sup>Department of Electronics and Nanoengineering, Aalto University, P.O. Box 13500, FI-00076 Aalto, Finland. <sup>3</sup>Department of Mechanical Engineering, College of Electrical and Mechanical Engineering, National University of Science and Technology, Islamabad 44000, Pakistan. <sup>4</sup>Department of Mechanical Engineering, Chung-Ang University, Seoul, South Korea. <sup>5</sup>School of Mechanical Engineering, Yonsei University, 50 Yonsei-ro, Seodaemun-gu, Seoul 03722, South Korea. <sup>6</sup>School of Electrical Engineering & Intelligentization, Dongguan University of Technology (DGUT), Dongguan, 523808, Guangdong, China. <sup>7</sup>Institute of Microscale Optoelectronics, Collaborative Innovation Centre for Optoelectronic Science & Technology, Key Laboratory of Optoelectronic Devices and Systems of Ministry of Education and Guangdong Province, College of Physics and Optoelectronic Engineering, Shenzhen Key Laboratory of Micro-Nano Photonic Information Technology, Guangdong Laboratory of Artificial Intelligence and Digital Economy (SZ), Shenzhen University, Shenzhen 518060, P.R. China. <sup>8</sup>Graphene Research Institute-Texas Photonics Center International Research Center (GRI-TPCIRC), Sejong University, Seoul 05006, Korea.

†These authors contributed equally to this work

\*Corresponding email: [mfk@sejong.ac.kr](mailto:mfk@sejong.ac.kr)

- 1. Thickness of WS<sub>2</sub> flake**
- 2. 8 nm thick WS<sub>2</sub> device results**
- 3. Arrhenius plots of Ni and Gr/Ni contacted WS<sub>2</sub> device**
- 4. Extraction of Contact Resistance**
- 5. Comparative Table of WS<sub>2</sub> and MoS<sub>2</sub> based *p-n* junctions**
- 6. Comparative table of photoresponsivity of WS<sub>2</sub> and MoS<sub>2</sub> based devices**

## 1. Thickness of WS<sub>2</sub>

Atomic force microscopy was employed to ascertain the thickness of WS<sub>2</sub> flakes. For given device, the topographic image of WS<sub>2</sub> flake was collected by scanning AFM in the square region of Figure S1(a) is shown in Figure S1(b). The height profile of the WS<sub>2</sub> flake is collected along the indicated path. Figure S1(c) represents that the WS<sub>2</sub> flake is ~14 nm thick.

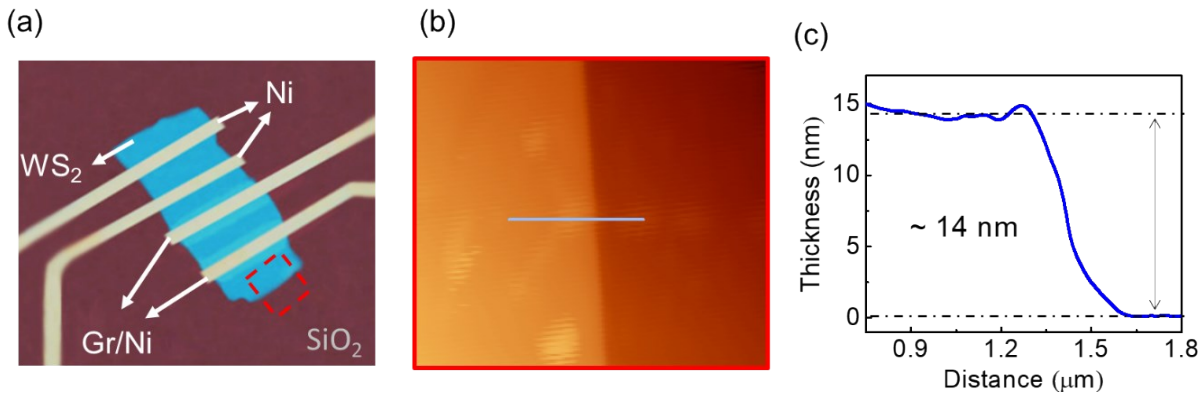

**Figure S1. Thickness of WS<sub>2</sub> flake:** (a) is the OM image of the WS<sub>2</sub> back gate devices with the Ni and the hybrid Gr/Ni contacts. (b) AFM topographic image of the WS<sub>2</sub> flake as indicated by red box in (a). The blue line is the scanning path to obtain the thickness profile. (c) The obtained thickness profile WS<sub>2</sub> flake collected from the AFM image.

## 2. 8 nm thick WS<sub>2</sub> device data

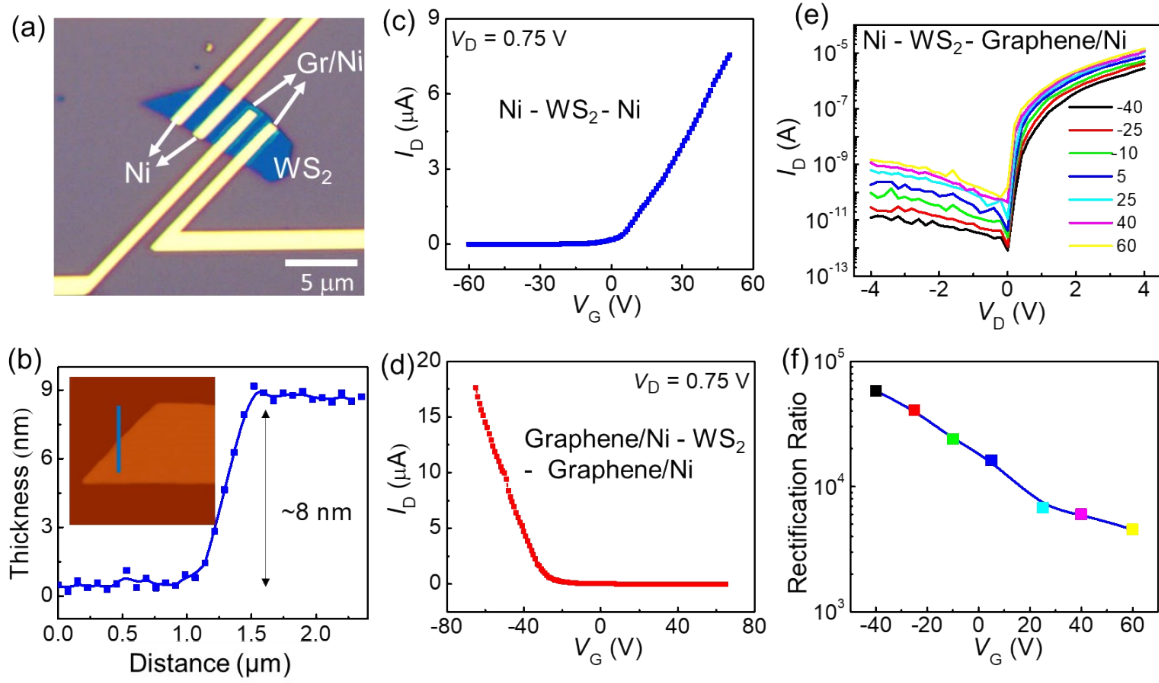

**Figure S2. 8 nm thick WS<sub>2</sub> device:** (a) is the optical micrograph image of the 8 nm thick WS<sub>2</sub> devices with the Ni/Au and the hybrid Gr/Ni contacts. (b) The thickness profile of WS<sub>2</sub> flake obtained along the blue line shown in AFM image in inset. (c) & (d) are the transfer curves of the Ni-contacted WS<sub>2</sub> device and the Gr/Ni contacted WS<sub>2</sub> device at  $V_D = 750$  meV. (e) The output curves of asymmetrically contacted WS<sub>2</sub> device. (f) The rectification ratio (ratio of forward bias current to reverse bias current) as a function of gate bias, measured from plots shown in (e) at  $V_D = \pm 2$  V. Note that at same measurement conditions, the 8 nm thick WS<sub>2</sub> device shows higher rectification ratio as compared to 14 nm thick WS<sub>2</sub> device.

### 3. Arrhenius plots of Ni and Gr/Ni contacted WS<sub>2</sub> device

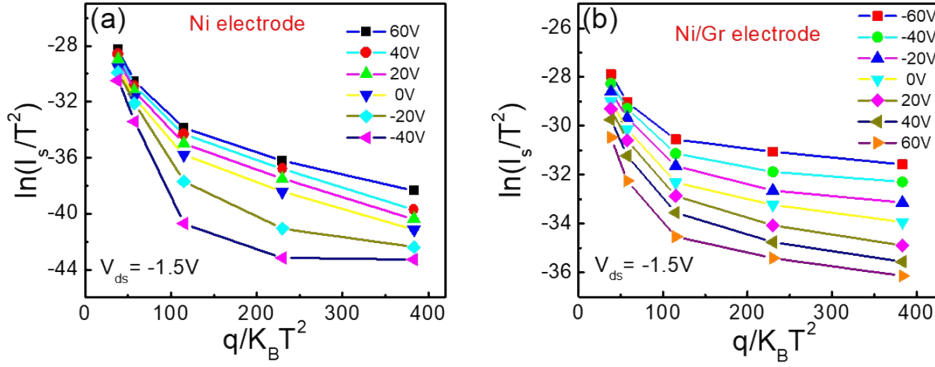

**Figure S3. Arrhenius plots.** The Arrhenius plots are extracted from the low temperature measurements at given back gate bias conditions. (a) for Ni contacted WS<sub>2</sub> device and (b) for Gr/Ni hybrid electrodes contacted WS<sub>2</sub> device. The decreasing slope of these curves gives the Schottky barrier height value for the corresponding interfaces, according to the equation (4) in main manuscript.

### 4. Extraction of Contact Resistance

Besides Schottky barrier height, contact resistance is another critical parameter to characterize the metal-semiconductor interface, and typically extracted by four-probe measurements or transfer length method. Given the two-probe geometry of our device, it is challenging to extract the contact  $R_c$ . However, the total device resistance in a device is comprised of channel resistance ( $R_{CH}$ ) and twice of contact resistance ( $R_c$ ). At large applied  $V_G$ , the carrier concentration in a device is increased. In result, the channel become highly conductive. In other words,  $R_{CH}$  becomes negligible, and the total device resistance approaches to the twice of  $R_c$ .<sup>1</sup> Using this scheme, we plotted the  $R_c$  for Ni-WS<sub>2</sub> and Gr/Ni-WS<sub>2</sub> interfaces from their respective transfer curves, as shown in Fig. S2. We understand that the measured  $R_c$  values are overestimated, and approaches to true value of  $R_c$ , as absolute value of  $V_G$  increases. Nonetheless, the  $V_G$

dependent plots follow the typical  $n$ -type and  $p$ -type trends for Ni-contacted and Gr/Ni contacted WS<sub>2</sub> device.

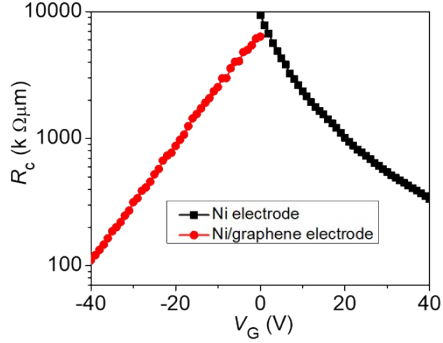

**Figure S4: Contact resistance.** The contact resistance as a function of  $V_G$  for Ni-contacted and Gr/Ni contacted WS<sub>2</sub> device.

### 5. Comparative Table of WS<sub>2</sub> and MoS<sub>2</sub> based $pn$ junctions

| S. No | Materials                           | Device Structure                                 | Thickness (nm)         | Rectification ratio | Ideality Factor | Voc (V) | Ref       |
|-------|-------------------------------------|--------------------------------------------------|------------------------|---------------------|-----------------|---------|-----------|
| 1     | WS <sub>2</sub>                     | Hybrid contacts to WS <sub>2</sub>               | 14                     | 10000               | 1.6             | 0.31    | This work |
| 2     | BP / WS <sub>2</sub>                | Planar heterostructure                           | 7.6 / 9.5              | 26000               | 1.7             | 0.35    | 2         |
| 3     | WS <sub>2</sub> / MoS <sub>2</sub>  | CVD grown Planar & Vertical Heterostructures     | Monolayer/ Monolayer   | 100                 | NA              | 0.12    | 3         |
| 4     | WS <sub>2</sub> / MoS <sub>2</sub>  | Vertical Heterostructure                         | Multilayer/ Multilayer | 10000               | NA              | 0.25    | 4         |
| 5     | WSe <sub>2</sub> / WS <sub>2</sub>  | CVD grown Planar heterojunction                  | Multilayer             | NA                  | NA              | 0.47    | 5         |
| 6     | WS <sub>2</sub> / ReSe <sub>2</sub> | Planar heterostructure                           | 80 / 147               | 30                  | NA              | NA      | 6         |
| 7     | SnS / WS <sub>2</sub>               | CVD grown Vertical Heterostructure               | 200 / 0.7              | 15                  | 3.8             | NA      | 7         |
| 8     | Gr/WS <sub>2</sub> /Gr              | Vertical FET                                     | 3.5                    | 1000000             | NA              | NA      | 8         |
| 9     | WS <sub>2</sub> / GaN               | CVD grown WS <sub>2</sub> Heterojunction (2D-3D) | 400                    | > 100               | NA              | NA      | 9         |
| 10    | WS <sub>2</sub> / Si                | Vertical heterostructure                         | 54 / bulk              | 1000                | NA              | NA      | 10        |
| 11    | MoS <sub>2</sub>                    | Vertical & Chemical doping                       | 3                      | 100                 | 1.6             | 0.6     | 11        |
| 12    | MoS <sub>2</sub>                    | Lateral Chemical doping                          | 60                     | 30                  | 1               | 0.5     | 12        |
| 13    | MoS <sub>2</sub>                    | Thickness offset                                 | 6.9 / 0.65             | 1000                | 1.95            | NA      | 13        |

## 6. Comparative table of photoresponsivity of WS<sub>2</sub> and MoS<sub>2</sub> based devices

| S. No                 | Materials                                               | Wavelength (nm) | Optical Power (mWcm <sup>-2</sup> ) | Responsivity (A/W)   | Ref       |
|-----------------------|---------------------------------------------------------|-----------------|-------------------------------------|----------------------|-----------|
| 1                     | 14 nm WS <sub>2</sub> -hybrid contacts                  | 532             | 0.14                                | 4×10 <sup>4</sup>    | This work |
| 2                     | 14 nm WS <sub>2</sub> -hybrid contacts                  | 850             | 0.14                                | 2×10 <sup>4</sup>    | This work |
| 3                     | 6 nm WS <sub>2</sub>                                    | 458             | 2*                                  | 2.1×10 <sup>-5</sup> | 14        |
| 4                     | 42 nm WS <sub>2</sub>                                   | 633             | 30                                  | 5.7                  | 15        |
| 5                     | 20 nm WS <sub>2</sub>                                   | 630             | 250                                 | 0.27                 | 16        |
| 6                     | Gr/WS <sub>2</sub> /Gr<br>(5~50-layer WS <sub>2</sub> ) | 633             | 10 <sup>-6*</sup>                   | 0.1                  | 17        |
| 7                     | Lateral WS <sub>2</sub> /MoS <sub>2</sub>               | 633             | 141                                 | 1.42                 | 4         |
| 8                     | BP/WS <sub>2</sub>                                      | 600             | 1.2×10 <sup>-6*</sup>               | 0.5                  | 2         |
| 9                     | 2L WS <sub>2</sub> /graphene                            | 532             | 2.7×10 <sup>5</sup>                 | 0.74                 | 18        |
| 10                    | 0.65 nm MoS <sub>2</sub>                                | 561             | 2.38×10 <sup>5</sup>                | 880                  | 19        |
| 11                    | 0.65 nm MoS <sub>2</sub>                                | 532             | 8×10 <sup>4</sup>                   | 7.5×10 <sup>3</sup>  | 20        |
| 12                    | 2 nm MoS <sub>2</sub>                                   | 532             | 2×10 <sup>3</sup>                   | 5.7×10 <sup>-1</sup> | 21        |
| 13                    | MoS <sub>2</sub> Chemical doping                        | 500             | -                                   | 5.07                 | 12        |
| 14                    | 15-19 nmMoS <sub>2</sub> pn junction                    | 660             | 80                                  | 0.25                 | 22        |
| 15                    | 4 nm/28 nm MoSe <sub>2</sub><br>homojunction            | 635             | 14.4                                | 550                  | 23        |
| <i>*units in Watt</i> |                                                         |                 |                                     |                      |           |

## Reference:

- S1 N. Petrone, T. Chari, I. Meric, L. Wang, K. L. Shepard, J. Hone, T. Roy, M. Tosun, J. S. Kang, A. B. Sachid, S. B. Desai, M. Hettick, C. C. Hu and A. Javey, *ACS Nano*, 2014, **8**, 6259–6264.
- S2 G. Dastgeer, M. F. Khan, G. Nazir, A. M. Afzal, S. Aftab, B. A. Naqvi, J. Cha, K.-A. Min, Y. Jamil, J. Jung, S. Hong and J. Eom, *ACS Appl. Mater. Interfaces*, 2018, **10**, 13150–13157.
- S3 Y. Gong, J. Lin, X. Wang, G. Shi, S. Lei, Z. Lin, X. Zou, G. Ye, R. Vajtai, B. I. Yakobson, H. Terrones, M. Terrones, B. K. Tay, J. Lou, S. T. Pantelides, Z. Liu, W. Zhou and P. M. Ajayan, *Nat. Mater.*, 2014, **13**, 1135–1142.
- S4 N. Huo, J. Kang, Z. Wei, S.-S. Li, J. Li and S.-H. Wei, *Adv. Funct. Mater.*, 2014, **24**, 7025–7031.
- S5 X. Duan, C. Wang, J. C. Shaw, R. Cheng, Y. Chen, H. Li, X. Wu, Y. Tang, Q. Zhang, A. Pan, J. Jiang, R. Yu, Y. Huang and X. Duan, *Nat. Nanotechnol.*, 2014, **9**, 1024–1030.
- S6 C. Wang, S. Yang, W. Xiong, C. Xia, H. Cai, B. Chen, X. Wang, X. Zhang, Z. Wei, S. Tongay, J. Li and Q. Liu, *Phys. Chem. Chem. Phys.*, 2016, **18**, 27750–27753.
- S7 A. Sukma Aji, M. Izumoto, K. Suenaga, K. Yamamoto, H. Nakashima and H. Ago, *Phys. Chem. Chem. Phys.*, 2018, **20**, 889–897.
- S8 T. Georgiou, R. Jalil, B. D. Belle, L. Britnell, R. V. Gorbachev, S. V. Morozov, Y.-J. Kim,



- A. Gholinia, S. J. Haigh, O. Makarovsky, L. Eaves, L. A. Ponomarenko, A. K. Geim, K. S. Novoselov and A. Mishchenko, *Nat. Nanotechnol.*, 2013, **8**, 100–103.
- S9 Y. Yu, P. W. K. Fong, S. Wang and C. Surya, *Sci. Rep.*, 2016, **6**, 37833.
- S10 S. Aftab, M. F. Khan, K.-A. Min, G. Nazir, A. M. Afzal, G. Dastgeer, I. Akhtar, Y. Seo, S. Hong and J. Eom, *Nanotechnology*, 2018, **29**, 045201.
- S11 H.-M. Li, D. Lee, D. Qu, X. Liu, J. Ryu, A. Seabaugh and W. J. Yoo, *Nat. Commun.*, 2015, **6**, 6564.
- S12 M. S. Choi, D. Qu, D. Lee, X. Liu, K. Watanabe, T. Taniguchi and W. J. Yoo, *ACS Nano*, 2014, **8**, 9332–9340.
- S13 M. Sun, D. Xie, Y. Sun, W. Li, C. Teng and J. Xu, *Sci. Rep.*, 2017, **7**, 4505.
- S14 N. Perea-López, A. L. Elías, A. Berkdemir, A. Castro-Beltran, H. R. Gutiérrez, S. Feng, R. Lv, T. Hayashi, F. López-Urías, S. Ghosh, B. Muchharla, S. Talapatra, H. Terrones and M. Terrones, *Adv. Funct. Mater.*, 2013, **23**, 5511–5517.
- S15 N. Huo, S. Yang, Z. Wei, S.-S. Li, J.-B. Xia and J. Li, *Sci. Rep.*, 2015, **4**, 5209.
- S16 S. Hwan Lee, D. Lee, W. Sik Hwang, E. Hwang, D. Jena and W. Jong Yoo, *Appl. Phys. Lett.*, 2014, **104**, 193113.
- S17 L. Britnell, R. M. Ribeiro, A. Eckmann, R. Jalil, B. D. Belle, A. Mishchenko, Y. J. Kim, R. V. Gorbachev, T. Georgiou, S. V. Morozov, A. N. Grigorenko, A. K. Geim, C. Casiraghi, A. H. C. Neto and K. S. Novoselov, *Science (80-. )*, 2013, **340**, 1311–1314.
- S18 H. Huang, Y. Sheng, Y. Zhou, Q. Zhang, L. Hou, T. Chen, R.-J. Chang and J. H. Warner, *ACS Appl. Nano Mater.*, 2018, **1**, 6874–6881.

- S19 O. Lopez-Sanchez, D. Lembke, M. Kayci, A. Radenovic and A. Kis, *Nat. Nanotechnol.*, 2013, **8**, 497–501.
- S20 Z. Yin, H. Li, H. Li, L. Jiang, Y. Shi, Y. Sun, G. Lu, Q. Zhang, X. Chen and H. Zhang, *ACS Nano*, 2012, **6**, 74–80.
- S21 D.-S. Tsai, K.-K. Liu, D.-H. Lien, M.-L. Tsai, C.-F. Kang, C.-A. Lin, L.-J. Li and J.-H. He, *ACS Nano*, 2013, **7**, 3905–3911.
- S22 S. A. Svatek, E. Antolin, D.-Y. Lin, R. Frisenda, C. Reuter, A. J. Molina-Mendoza, M. Muñoz, N. Agraït, T.-S. Ko, D. P. de Lara and A. Castellanos-Gomez, *J. Mater. Chem. C*, 2017, **5**, 854–861.
- S23 Y. Yang, N. Huo and J. Li, *J. Mater. Chem. C*, 2017, **5**, 7051–7056.
